# Supplementary material for: Venetoclax and Daratumumab combination treatment demonstrates pre-clinical efficacy in mouse models of Acute Myeloid Leukemia
Source: PubMed Central journal article supplement (PMC8117650; doi:10.1186/s40364-021-00291-y), 2021-05-13
Supplement: 40364_2021_291_MOESM2_ESM.pdf [file 40364_2021_291_MOESM2_ESM.pdf]

## 1 **Methods**

2

### 3 **Animals**

4 NOD.Cg-Prkdcscid IL2rgtm1Wjl/SzJ (NSG) mice (The Jackson Laboratory, Bar  
5 Harbour, ME, USA) were used in this study.  $0.5 \times 10^6$  primary AML blasts or MV411  
6 AML cells were intravenously injected into non-irradiated NSG mice. Mice were  
7 monitored by *in vivo* bioluminescent imaging (Bruker, Coventry UK). Animals were  
8 housed in a specific pathogen-free facility. All animal work used in this study were  
9 carried out in accordance with regulations set by the UK Home Office and the Animal  
10 Scientific Procedures Act 1986. Mice used were at age 8-12 weeks of age and both  
11 genders were used for experiments.

12

### 13 **Method Details**

14

#### 15 **Primary cell isolation and culture**

16 Primary AML blasts were obtained from the bone marrow of AML patients with  
17 informed consent, under approval from the UK National Research Ethics Service  
18 (LRCEref07/H0310/146). Non-malignant CD34+ haematopoietic stem cells were  
19 obtained from cord blood from caesarean section. AML cell isolation was carried out  
20 by gradient density centrifugation using Histopaque (Sigma-Aldrich) and cell type was  
21 confirmed by flow cytometry as previously described (1). CD34+ HSC were first  
22 isolated using gradient density centrifugation followed by CD34+ microbeads  
23 magnetic separation (Miltenyi Biotec). Mesenchymal stromal cell (MSC) were isolated  
24 by gradient density centrifugation and characterized by their fibroblast like shape and  
25 adherence to tissue culture plastic. MSC were expanded in Dulbecco's Modified  
26 Eagle's Medium (DMEM) supplemented with 20% foetal bovine serum (FBS) and 1%  
27 penicillin-streptomycin (Hyclone, Life Sciences). MSC were further characterised  
28 using flow cytometry for expression of CD90+, CD73+, CD105+ and CD45-.

29

#### 30 **Flow Cytometry**

31 In this study the CyFlow Cube 6 (Sysmex, Milton Keynes, UK) was used. Cells were  
32 incubated for 5 minutes with an FCR receptor blocker (Miltenyi Biotec,) and then  
33 stained with isotype controls or test antibodies human CD38-FITC (Miltenyi Biotec).  
34 For experiments using BCL-2-FITC the cells fixed and permeabilized using the FIX &

35 PERM™ Cell Permeabilization Kit (ThermoFisher ) as per manufacturer's instructions.  
36 The cells were then stained with BCL-2FITC, human and mouse (Miltenyi Biotec) for  
37 20 minutes centrifuged at 1200rpm for 5 minutes before resuspending in PBS. Data  
38 were analyzed using FlowJo (TreeSta). See figures for specific gating strategies.

39

#### 40 **Annexin V assay**

41 MSC were seeded at  $5 \times 10^4$  cells/well of a 24-well plate AML cells were placed on the  
42 MSC at a density of  $1.5 \times 10^5$  in normal growth media. Control PBS, Venetoclax  
43 (100nm) alone Daratumumab (100ng/ml) alone or Venetoclax and Daratumumab in  
44 combination were then added to the coculture. MSC/AML cocultures were then  
45 incubated for 24 hours. AML blasts were removed, and apoptosis was quantified using  
46 PI/AnnexinV assay (eBiosciences) and annexin V positive cells were measured using  
47 flow cytometry.

48

#### 49 **Cell titre glow**

50 The viability of AML following culture with Daratumumab or Venetoclax was assessed  
51 using the CellTitre-Glo assay (Promeg). For the assay  $1 \times 10^4$  primary AML cells in  $50 \mu\text{l}$   
52 were cultured in a 96 well plate and cultured with varying does of Daratumumab or  
53 Venetoclax or Venetoclax and Daratumumab in combination for 24hours. The cells  
54 were then transferred to a 96 well white plate and  $50 \mu\text{l}$  of CellTitre-Glo substrate was  
55 added and incubated for 10 minutes in the dark. Luminecence was measured at an  
56 emission wavelength 560nm using the LUMIstar Omega microplate reader (BMG  
57 LABTECH).

58

#### 59 **Bioluminescence imaging**

60 To monitor AML engraftment bioluminescent imaging of live mice was carried out.  
61 Mice were intraperitoneally injected with  $150 \text{mg/kg}$  D-luciferin on day 7 and 17. The  
62 mice were then left for 15 minutes at room temperature for maximum detection of the  
63 luciferase signal. The mice anaesthetised using a chamber filled with isoflurane. The  
64 mice were an imaged using a pre-set method of 1-minute exposure bioluminescent  
65 image, x-ray and light image.

66

67

68

69 **Quantification and Statistical Analysis**

70 Due to variability in the data, statistical comparison of work was performed without  
71 assumption of normal distribution using Mann-Whitney U test. For statistical  
72 comparison of more than two groups were compared, Kruskal-Wallis test followed by  
73 Dunn's multiple comparisons using Prism version 7.00 for Windows (GraphPad).  
74 Differences among group means were considered significant when the probability  
75 value, p, was less than 0.05\* 0.01\*\*. Sample size (n) represents number of biological  
76 replicates. No statistical methods were used to predetermine sample size.

77

78

79

80 **References**

81 1. Zaitseva L, Murray MY, Shafat MS, Lawes MJ, MacEwan DJ, Bowles KM, et  
82 al. Ibrutinib inhibits SDF1/CXCR4 mediated migration in AML. *Oncotarget*.  
83 2014;5(20):9930-8.

84
